# Supplementary material for: GA101 (obinutuzumab) monocLonal Antibody as Consolidation Therapy In CLL (GALACTIC) trial: study protocol for a phase II/III randomised controlled trial
Source: PubMed Central journal article supplement (PMC5530563; doi:10.1186/s13063-017-2107-0), 2017-07-26
Supplement: 13063_2017_2107_MOESM2_ESM.pdf [file 13063_2017_2107_MOESM2_ESM.pdf]

List of GALACTIC participating centres

|                                           |
|-------------------------------------------|
| Aberdeen Royal Infirmary                  |
| Addenbrookes Hospital                     |
| Arrowe Park Hospital                      |
| Basildon and Thurrock University Hospital |
| Basingstoke and North Hampshire Hospitals |
| Belfast City Hospital                     |
| Birmingham Heartlands Hospital            |
| Cheltenham and Gloucestershire Hospitals  |
| Darent Valley Hospital                    |
| Diana, Princes of Wales Hospital          |
| Glan Clwyd Hospital                       |
| Glangwili General Hospital                |
| Kings College Hospital                    |
| Leicester Royal Infirmary                 |
| Medway Maritime Hospital                  |
| Musgrove Park Hospital                    |
| Norfolk and Norwich Hospital              |
| Queen's Hospital, Burton                  |
| Queen's Hospital, Romford                 |
| Raigmore Hospital                         |
| Royal Bournemouth Hospital                |
| Royal Cornwall Hospital                   |
| Royal Hallamshire Hospital                |
| Royal Hampshire Hospital                  |
| Royal Liverpool Hospital                  |
| Russells Hall Hospital                    |
| Salisbury Hospital                        |
| Scunthorpe Hospital                       |
| St Bartholomew's Hospital                 |
| St James's University Hospital            |
| Sunderland Royal Hospital                 |
| University College London Hospital        |
| University Hospital South Manchester      |
| University Hospital, Coventry             |
| Western General Hospital                  |
| Worcestershire Royal Hospital             |
| Wrexham Maelor Hospital                   |
| Ysbyty Gwynedd                            |
